# Supplementary material
Source: MDPI journal article supplement (https://www.mdpi.com/2073-4433/12/3/375)
Supplement: s1 [file s1]

## Sources of Formaldehyde in Bountiful, Utah

Nitish Bhardwaj <sup>1</sup>, Ariel Kelsch <sup>1</sup>, Delbert J. Eatough <sup>1</sup>, Ryan Thalman <sup>2</sup>, Nancy Daher <sup>3</sup>, Kerry Kelly <sup>4</sup>, Isabel Cristina Jaramillo <sup>4</sup> and Jaron C. Hansen <sup>1,\*</sup>

<sup>1</sup> Department of Chemistry and Biochemistry, Brigham Young University, Provo, UT 84602, USA; bhardwaj15nitish@gmail.com (N.B.); arielkelsch123@gmail.com (A.K.); delbert@eatough.net (D.J.E.)

<sup>2</sup> Department of Chemistry, Snow College, Richfield, UT 84701, USA; ryan.thalman@snow.edu

<sup>3</sup> Utah Division of Air Quality, Salt Lake City, UT 84116, USA; ndaher@utah.gov

<sup>4</sup> Chemical Engineering, University of Utah, Salt Lake City, UT 84112, USA; kerry.kelly@utah.edu (K.K.); cristina.jaramillo@utah.edu (C.J.)

\* Correspondence: jhansen@chem.byu.edu; Tel.: 801-422-4066

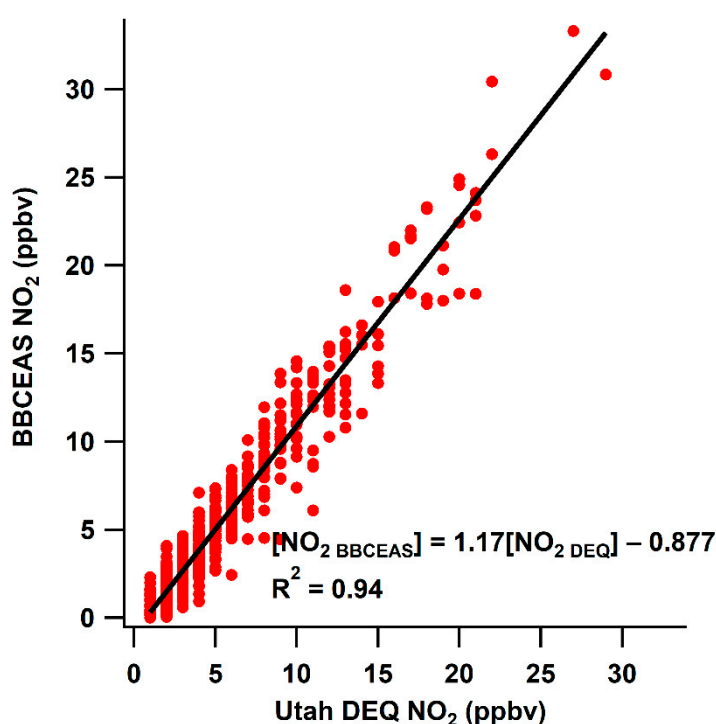

**Figure S1.** Comparison of the NO<sub>2</sub> concentrations measured by the BBCEAS and the Teledyne Advanced Pollution Instrumentation (API) T series NO<sub>x</sub> analyzer operated by Utah DAQ during the 2019 air sampling campaign from February 2019 to June 2019.

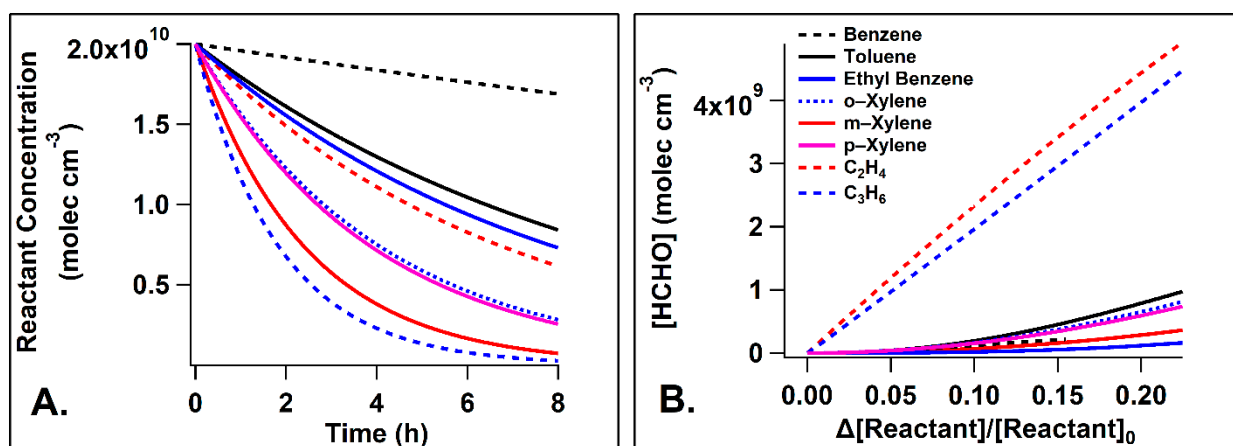

**Figure S2.** (a) Box modelling of oxidation of BTEX and light alkene compounds as a function of time (hr). (b) Rate of HCHO production as a function of VOC and loss of reactant concentration.
